# Supplementary material for: Providing Low-Income Women With a Manual Pump: A Pilot Study
Source: PubMed Central journal article supplement — Hosp Pediatr. 2023 Jan 17;13(2):115–24. doi: 10.1542/hpeds.2021-006380 (PMC9875111; doi:10.1542/hpeds.2021-006380), 2023-01-17
Supplement: HPEDS_2021006380SupplementaryData.pdf [file HPEDS_2021006380SupplementaryData.pdf]

## Supplemental Information

### PUMP Study CONSORT Diagram

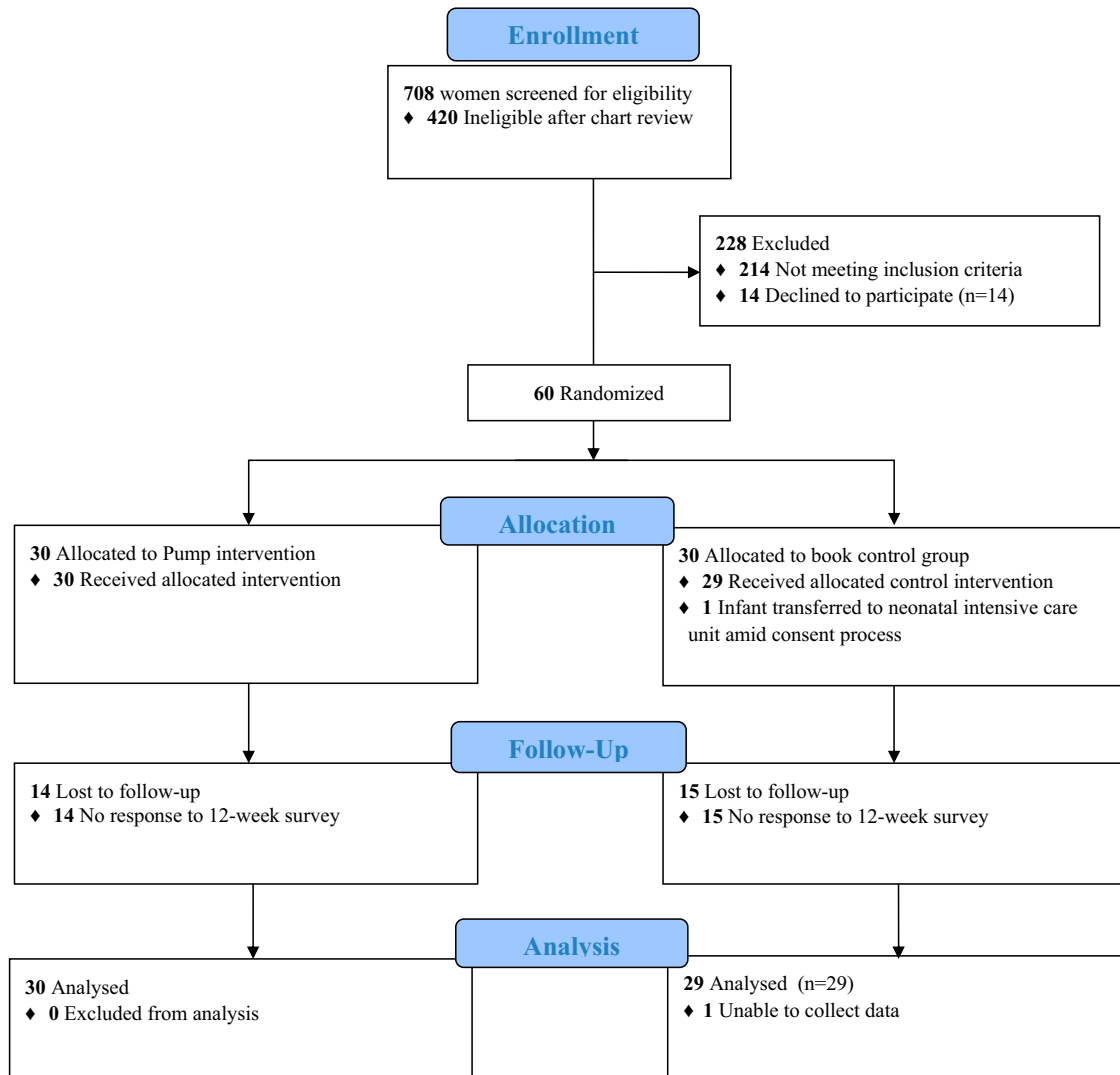

**SUPPLEMENTAL FIGURE 2** Pump Study CONSORT Diagram.

**SUPPLEMENTAL TABLE 5** Instructions for Participants in the Breast Pump Group

---

**Reasons to Use the Manual Breast Pump**

---

1. Feeling uncomfortably engorged (breasts are firm and painful) or baby having difficulty latching due to engorgement
  2. To express milk to give extra milk to your baby after feeding at breast
  3. To express milk to store to give your baby later (for example, if you are away from your baby for a short period of time)
  4. Separated from baby when baby would usually feed and desire to empty breasts to stimulate continued milk production
- 

**SUPPLEMENTAL TABLE 6** Follow-Up Survey

---

**Questionnaire items to assess breastfeeding exclusivity and duration**

---

1. Has your baby breastfed at breast in the last 24 hours?
  2. Has your baby received any of your pumped or expressed breast milk in the last 24 hours?
  3. Do you use a manual breast pump? \_\_\_\_\_
  4. Do you use an electric breast pump? \_\_\_\_\_
  5. Do you hand express breast milk? \_\_\_\_\_
  6. Has your baby received any formula in the last 24 hours?
  7. Has your baby received any breast milk from a woman other than you in the last 24 hours? \_\_\_\_\_
  8. Has your baby received any water, juice, or tea in the last 24 hours?
    - a. if yes, Which one?
  9. Has your baby received any solid foods in the last 24 hours?
  10. How old was your new baby the first time he or she drank liquids other than breast milk (such as formula, water, juice, tea, or cow's milk)? \_\_\_\_\_
  11. How old was your new baby the first time he or she ate food (such as baby cereal, baby food)? \_\_\_\_\_
-

**SUPPLEMENTAL TABLE 7** Participant Demographic and Clinical Characteristics by Those who Enrolled Versus Those who Completed the Study

| Characteristics of Participants    | Pump Intervention ( <i>n</i> = 30), <i>n</i> (%) <sup>a</sup> |                                        | Book Attention Control ( <i>n</i> = 29), <i>n</i> (%) |                                        |
|------------------------------------|---------------------------------------------------------------|----------------------------------------|-------------------------------------------------------|----------------------------------------|
|                                    | Left Study ( <i>n</i> = 14)                                   | Completed Study 12 wk ( <i>n</i> = 16) | Left Study ( <i>n</i> = 14)                           | Completed Study 12 wk ( <i>n</i> = 15) |
| <b>Race</b>                        |                                                               |                                        |                                                       |                                        |
| White                              | 10 (71)                                                       | 9 (56)                                 | 7 (50)                                                | 7 (47)                                 |
| Black/African American             | 2 (14)                                                        | 2 (12.5)                               | 3 (21)                                                | 2 (13)                                 |
| Asian                              | 0 (0)                                                         | 2 (12.5)                               | 0 (0)                                                 | 0 (0)                                  |
| Pacific Islander                   | 1 (7)                                                         | 0 (0)                                  | 1 (7)                                                 | 1 (7)                                  |
| American Indian /Alaska Native     | 0 (0)                                                         | 1 (7)                                  | 2 (14)                                                | 1 (7)                                  |
| Other                              | 1 (7)                                                         | 3 (19)                                 | 0 (0)                                                 | 4 (27)                                 |
| Hispanic ethnicity                 | 2 (14)                                                        | 8 (50)                                 | 4 (29)                                                | 7 (47)                                 |
| <b>Education</b>                   |                                                               |                                        |                                                       |                                        |
| 8th grade or less                  | 0 (0)                                                         | 0 (0)                                  | 0 (0)                                                 | 1 (7)                                  |
| Some high school                   | 3 (21)                                                        | 1 (7)                                  | 2 (14)                                                | 1 (7)                                  |
| High school grad or GED            | 6 (43)                                                        | 3 (19)                                 | 5 (36)                                                | 3 (20)                                 |
| Vocational or trade school         | 1 (7)                                                         | 0 (0)                                  | 1 (7)                                                 | 0 (0)                                  |
| Some college or associate's degree | 3 (21)                                                        | 8 (50)                                 | 3 (21)                                                | 6 (40)                                 |
| College graduate                   | 1 (7)                                                         | 2 (12.5)                               | 2 (14)                                                | 4 (27)                                 |
| Graduate school                    | 0 (0)                                                         | 2 (12.5)                               | 0 (0)                                                 | 0 (0)                                  |
| Missing                            | 0 (0)                                                         | 0 (0)                                  | 1 (7)                                                 | 0 (0)                                  |
| <b>Marital status</b>              |                                                               |                                        |                                                       |                                        |
| Single/never married               | 9 (64)                                                        | 6 (37.5)                               | 10 (71)                                               | 5 (33)                                 |
| Single/divorced/separated          | 0 (0)                                                         | 1 (7)                                  | 1 (7)                                                 | 0 (0)                                  |
| Married/live-in partner            | 4 (29)                                                        | 8 (50)                                 | 3 (21)                                                | 10 (67)                                |
| Other                              | 0 (0)                                                         | 1 (7)                                  | 0 (0)                                                 | 0 (0)                                  |
| Declined to answer                 | 1 (7)                                                         | 0 (0)                                  | 0 (0)                                                 | 0 (0)                                  |
| <b>Insurance</b>                   |                                                               |                                        |                                                       |                                        |
| No insurance                       | 0 (0)                                                         | 1 (7)                                  | 1 (7)                                                 | 0 (0)                                  |
| Private insurance                  | 2 (14)                                                        | 2 (12.5)                               | 2 (14)                                                | 8 (53)                                 |
| Medicaid/MediCal                   | 7 (50)                                                        | 11 (69)                                | 10 (71)                                               | 5 (33)                                 |
| Military insurance                 | 3 (21)                                                        | 0 (0)                                  | 1 (7)                                                 | 0 (0)                                  |
| Other                              | 1 (7)                                                         | 2 (12.5)                               | 0 (0)                                                 | 2 (13)                                 |
| Missing                            | 1 (7)                                                         | 0 (0)                                  |                                                       |                                        |
| Vaginal delivery                   | 8 (57)                                                        | 12 (75)                                | 12 (86)                                               | 11 (73)                                |
| Smoker                             | 1 (7)                                                         | 0 (0)                                  | 0 (0)                                                 | 0 (0)                                  |
| Smoker in household                | 3 (21)                                                        | 8 (50)                                 | 7 (50)                                                | 3 (20)                                 |
| Diabetes                           | 1 (7)                                                         | 2 (12.5)                               | 2 (14)                                                | 2 (13)                                 |

<sup>a</sup> Percentages may not sum to 100% because of rounding errors.
